# Supplementary material for: Dermal White Adipose Tissue (dWAT) Is Regulated by Foxn1 and Hif-1α during the Early Phase of Skin Wound Healing
Source: MDPI journal article supplement (doi:10.3390/ijms23010257), 2021-12-27
Supplement: s1 [file s1]

**Table S1. List of antibodies used for flow cytometry and immunohistochemistry assays.**

| Flow cytometry assay |                    |                |          |            |
|----------------------|--------------------|----------------|----------|------------|
| Antibody             | Probe fluorochrome | Vendor         | Cat. No  | Clone      |
| CD68                 | PE                 | BD Biosciences | 566387   | FA/11      |
| GFP                  | Alexa Fluor 488    | Thermo Fisher  | A21311   |            |
| mCherry              | Alexa Fluor 647    | Thermo Fisher  | M11241   | 16D7       |
| E-cadherin           | APC                | BioLegend      | 147312   | DECMA-1    |
| Vimentin             | PE-Cy7             | Abcam          | ab92547  | EPR3776    |
| Cytokeratin 6        | APC                | NSJ Boreagents | V2168    | LHK6       |
| Immunohistochemistry |                    |                |          |            |
| Antibody             | Concentration      | Vendor         | Cat.No   | Clonality  |
| Perilipin 1          | 1:200              | Abcam          | ab3526   | Polyclonal |
| Cytokeratin 16       | 1:300              | LsBio          | b7609    | Polyclonal |
| CD68                 | 1:200              | Abcam          | ab125212 | Polyclonal |

**Table S2. List of TaqMan gene expression assays**

| Gene                  | TaqMan® ID    |
|-----------------------|---------------|
| Ppar $\gamma$         | Mm00440940_m1 |
| Mest                  | Mm00485003_m1 |
| Fabp4                 | Mm00445878_m1 |
| Zfp 423               | Mm00473699_m1 |
| Bmp2                  | Mm01340178_m1 |
| Igf2                  | Mm00439564_m1 |
| eGFP                  | Mr04329676_mr |
| mCherry               | Mr07319438_mr |
| CD68                  | Mm03047343_m1 |
| Srebp1c               | Mm00550338_m1 |
| Fasn                  | Mm00662319_m1 |
| Glut1                 | Mm00441473_m1 |
| Glut4                 | Mm00436615_m1 |
| Hprt1                 | Mm01545399_m1 |
| Atgl (Pnpla2)         | Mm00503040_m1 |
| MIP-1 $\alpha$ (Ccl3) | Mm00441259_g1 |
| MIP-1 $\gamma$ (Ccl9) | Mm00441260_m1 |
